# Supplementary material for: Unprecedented non-aromatic, conformationally locked dibenzohexaphyrin analogs carrying multiple meso-exocyclic double bonds
Source: Royal Society of Chemistry journal article supplement (doi:10.1039/c3cc49380f), 2014-01-01

Electronic Supplementary Information

## Unprecedented non-aromatic, conformationally locked dibenzohexaphyrin analogs carrying multiple meso- exocyclic double bonds

Dowoo Park, Na Young Choi, Seung Jin Hong and Chang-Hee Lee\*

Department of Chemistry Kangwon National University, Chun Cheon 200-701, Korea

[chhlee@kangwon.ac.kr](mailto:chhlee@kangwon.ac.kr)

### Experimental

<sup>1</sup>H NMR spectra were recorded on a 300 MHz or 400 MHz NMR spectrometer using TMS as the internal standard. Chemical shifts are reported in parts per million (ppm). When peak multiplicities are given, the following abbreviations are used: s, singlet; brs, broad singlet; d, doublet; t, triplet; m, multiplet. <sup>13</sup>C NMR spectra were proton decoupled and recorded on a 100 MHz NMR spectrometer using TMS as the internal standard. All the other chemicals and solvents were purchased from commercial sources and were used as such, unless otherwise mentioned. Column chromatography was performed over silica gel.

### Compound (2)

*meso*-Compound **1** (0.12 g, 0.22 mmol) was dissolved in CH<sub>2</sub>Cl<sub>2</sub> (30 mL), then acetone (2.5 mL, 34.0 mmol) and trifluoroacetic acid (0.08 mL, 1.06 mmol) was added. The mixture was stirred for 3 hr at room temperature (25 °C). Then, the mixture was combined with aqueous NaOH (0.1 N, 50 mL) and extracted with CH<sub>2</sub>Cl<sub>2</sub> (50 mL × 3). The organic layer was dried (anhyd. Na<sub>2</sub>SO<sub>4</sub>) and solvent was removed under reduced pressure. The residual solid was purified by column chromatography on silica gel (CHCl<sub>3</sub>/EtOAc = 19/1) to afford pure product. Yield: 0.022 g (16%); <sup>1</sup>H NMR (300 MHz, DMSO-*d*<sub>6</sub>) δ 10.07 (bs, 4H), 7.21 (bs, 2H), 7.04 (bs, 6H), 5.60 (bs, 4H), 5.31 (bs, 4H), 4.49 (d, *J* = 12.22 Hz, 4H), 4.25 (d, *J* = 12.22 Hz, 4H), 4.04-3.80 (m, 16H), 1.42 (br s, 12H), 1.01-0.94 (m, 24H); <sup>13</sup>C NMR (100 MHz, DMSO-*d*<sub>6</sub>) δ 167.

61, 167.32, 141.60, 138.61, 130.23, 128.09, 126.23, 104.04, 103.71, 79.54, 61.13, 57.30, 29.24, 14.09, 13.96; MALDI-TOF MS Calcd for C<sub>66</sub>H<sub>80</sub>N<sub>4</sub>O<sub>16</sub>, exact mass 1184.56, Found 1185.59.

#### Compound (4)

Compound **5** (0.11 g, 0.20 mmol) and acetone (2.5 mL, 34.0 mmol) were dissolved in CH<sub>2</sub>Cl<sub>2</sub> (33 mL) and then TFA (0.08 mL, 1.06 mmol) was added. The whole mixture was stirred for 3 hr at room temperature. Then Aqueous NaOH (0.1 N, 30 mL) was added to quench the reaction and extracted with CH<sub>2</sub>Cl<sub>2</sub> (50 mL × 3). The organic layer was dried (anhydrous Na<sub>2</sub>SO<sub>4</sub>) and the solvent was removed in vacuo. The residual solid was purified by column chromatography on silica (CHCl<sub>3</sub>/EtOAc = 19/1) to afford pure product **4**. Yield: 0.014 g (12%); <sup>1</sup>H NMR (300 MHz, DMSO-d<sub>6</sub>) δ 9.99 (br s, 4H), 7.49 (t, J = 7.76 Hz, 2H), 7.03 (d, J = 7.76 Hz, 4H), 5.68 (br s, 4H), 5.37 (br s, 4H), 4.65 (d, J = 11.53 Hz, 4H), 4.47 (d, J = 11.53 Hz, 4H), 4.05-3.85 (m, 16H), 1.43 (br s, 12H), 1.02-0.95 (m, 24H); MALDI-TOF MS Calcd. for C<sub>64</sub>H<sub>78</sub>N<sub>6</sub>O<sub>16</sub> exact mass 1186.55, Found 1187.55.

#### Compound (8)

Compound **1** (0.017 g, 0.014 mmol) was dissolved in CH<sub>2</sub>Cl<sub>2</sub> (2 mL), then added DDQ (0.013 g, 0.057 mmol). The mixture was stirred for 1 hr at room temperature. The mixture was combined with brine (10 mL), then extracted with CH<sub>2</sub>Cl<sub>2</sub> (20 mL × 3). The organic layer was dried (anhyd. Na<sub>2</sub>SO<sub>4</sub>) and solvent was removed under reduced pressure. Column chromatography on silica gel (CHCl<sub>3</sub>/EtOAc = 19/1) afforded pure compound **6**. Yield: 0.009 g (58%); <sup>1</sup>H NMR (300 MHz, CDCl<sub>3</sub>) δ 11.86 (br s, 4H), 7.35 (d, J = 7.30 Hz, 4H), 7.28-7.23 (m, 6H), 7.08 (br s, 2H), 6.06 (br s, 4H), 5.92 (br s, 4H), 4.26 (q, J = 7.11 Hz, 8H), 3.91-3.89 (m, 8H), 1.79 (s, 12H), 1.28 (t, J = 7.11 Hz, 12H), 1.08 (t, J = 7.11 Hz, 12H) <sup>13</sup>C NMR (100 MHz, DMSO-d<sub>6</sub>) δ 167.08, 166.97, 146.07, 138.08, 129.11, 128.44, 126.62, 115.49, 107.23, 61.44, 60.84, 35.99, 26.15, 14.45, 13.93; MALDI-TOF MS Calcd for C<sub>66</sub>H<sub>72</sub>N<sub>4</sub>O<sub>16</sub> 1176.49, Found 1176.52.



**Figure S1.**  $^1\text{H}$  NMR spectrum of compound **2** in  $\text{CDCl}_3$ .

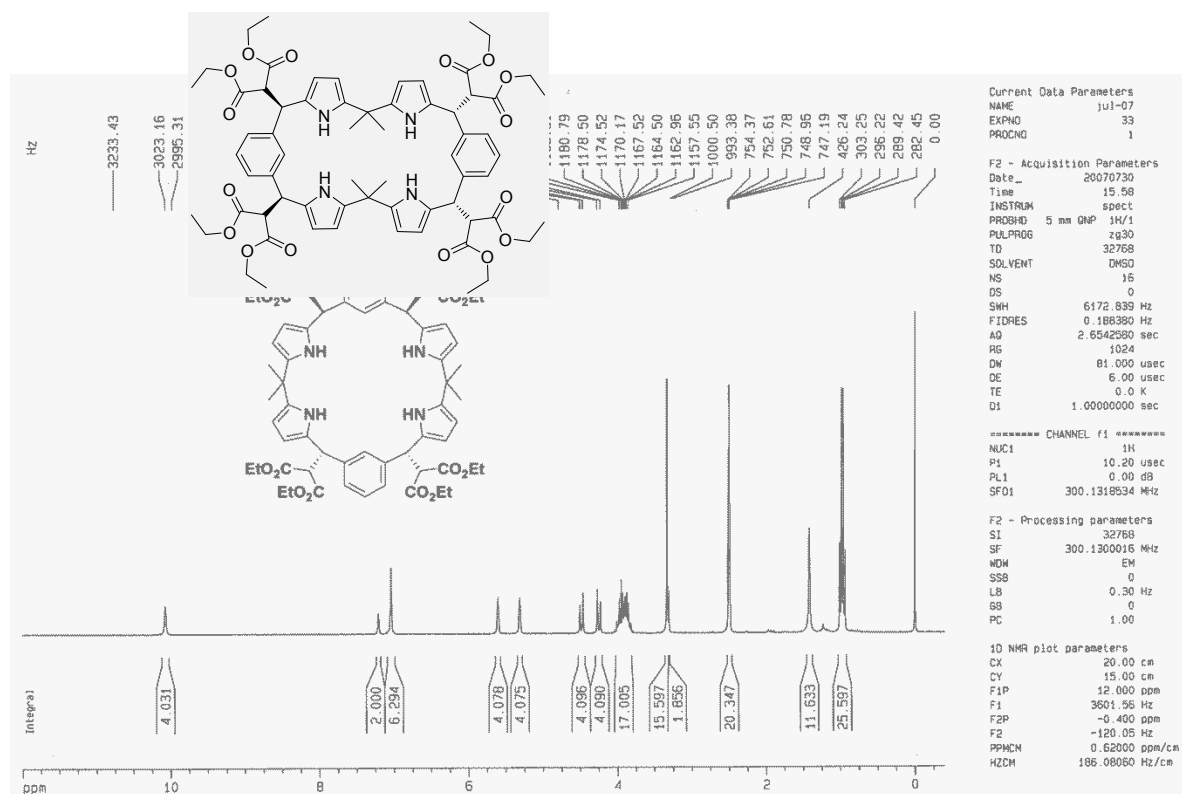

**Figure S2.** MALDI-TOF mass spectrum of compound **2**.

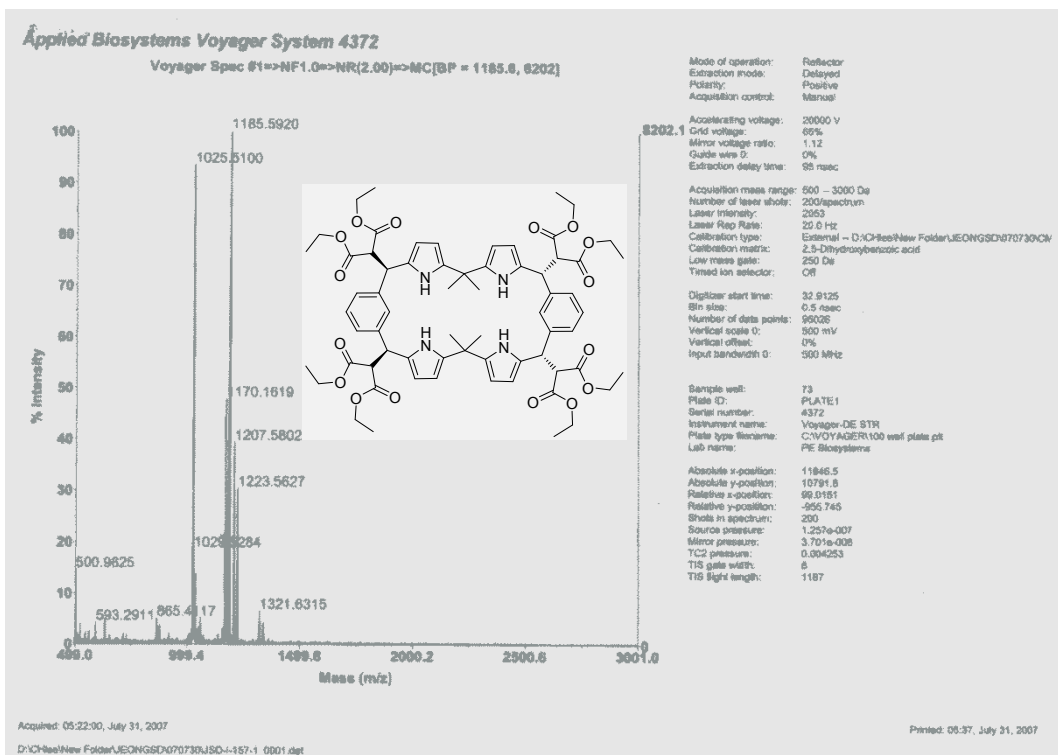

Figure S3.  $^{13}\text{C}$  NMR spectrum of compound **2** in  $\text{CDCl}_3$ .

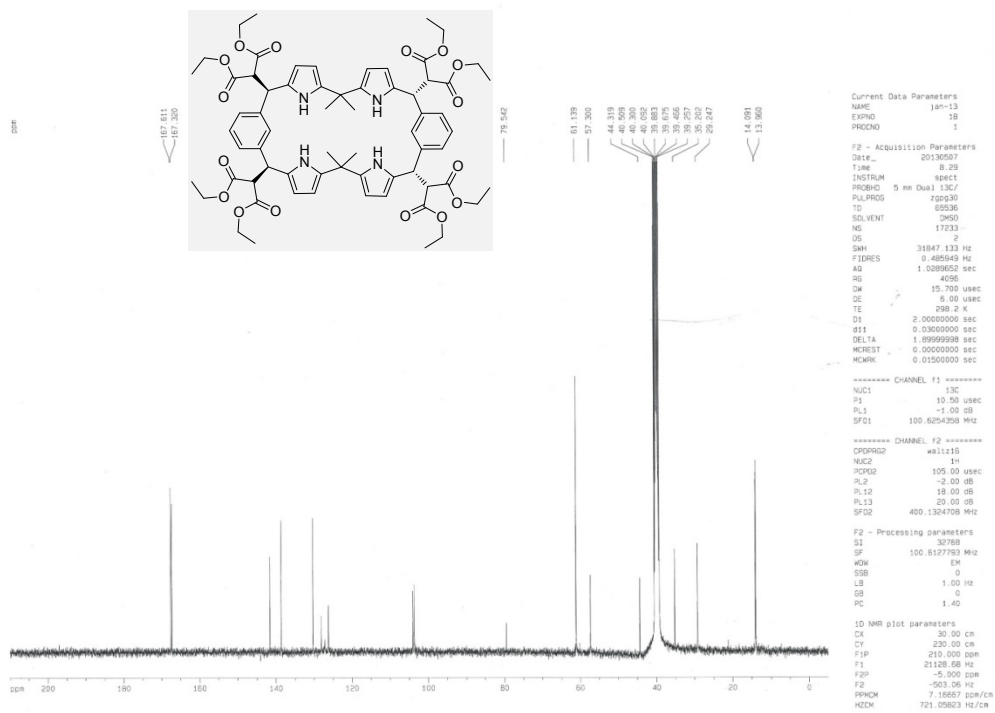

Figure S4.  $^1\text{H}$  NMR spectrum of compound 4 in  $\text{CDCl}_3$ .

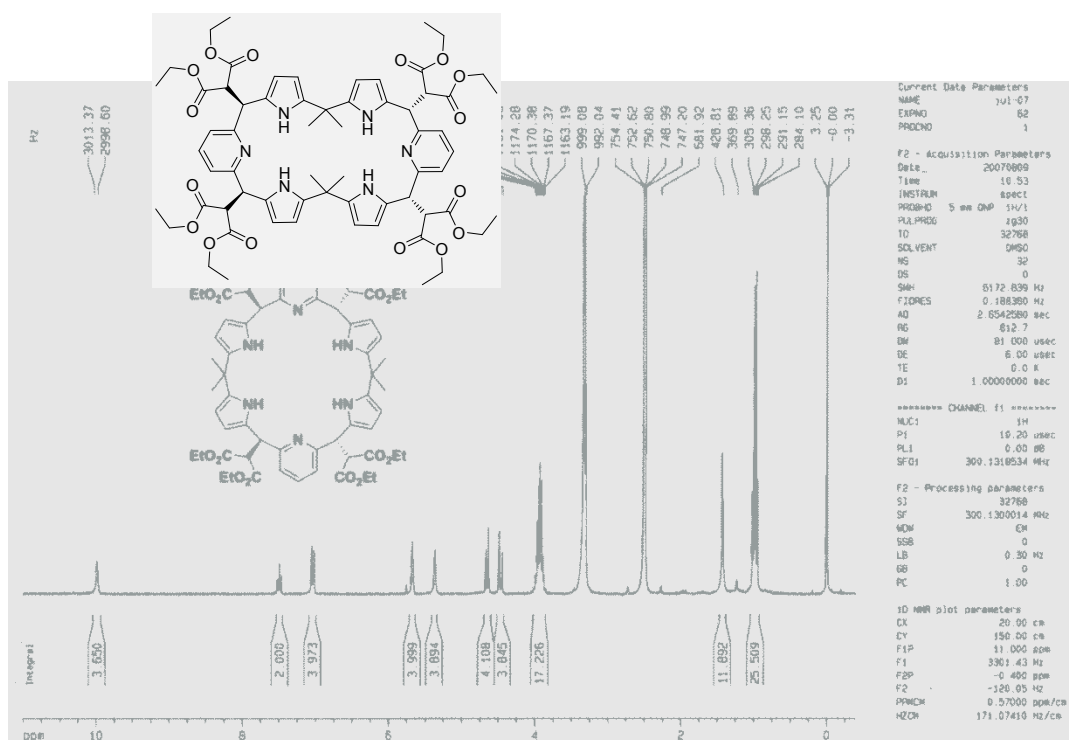

Figure S5. MALDI-TOF mass spectrum of compound 4 in CDCl<sub>3</sub>.

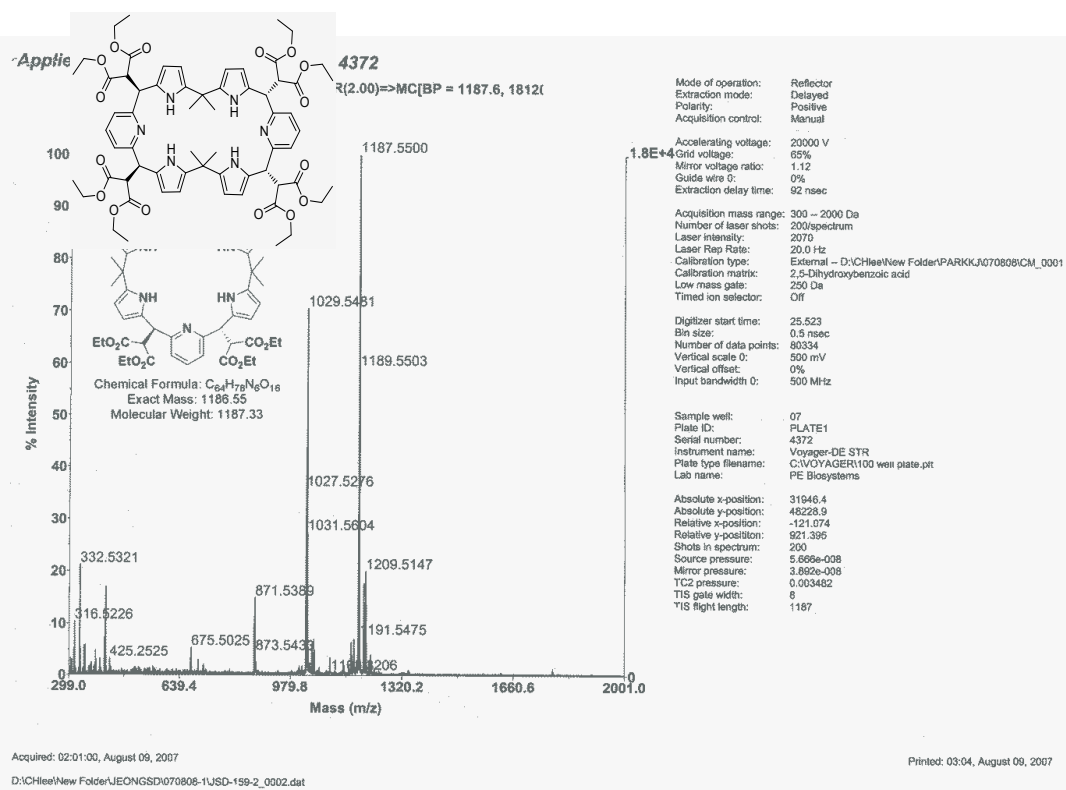

Figure S7.  $^1H$  NMR spectrum of compound **8** in  $CDCl_3$ .



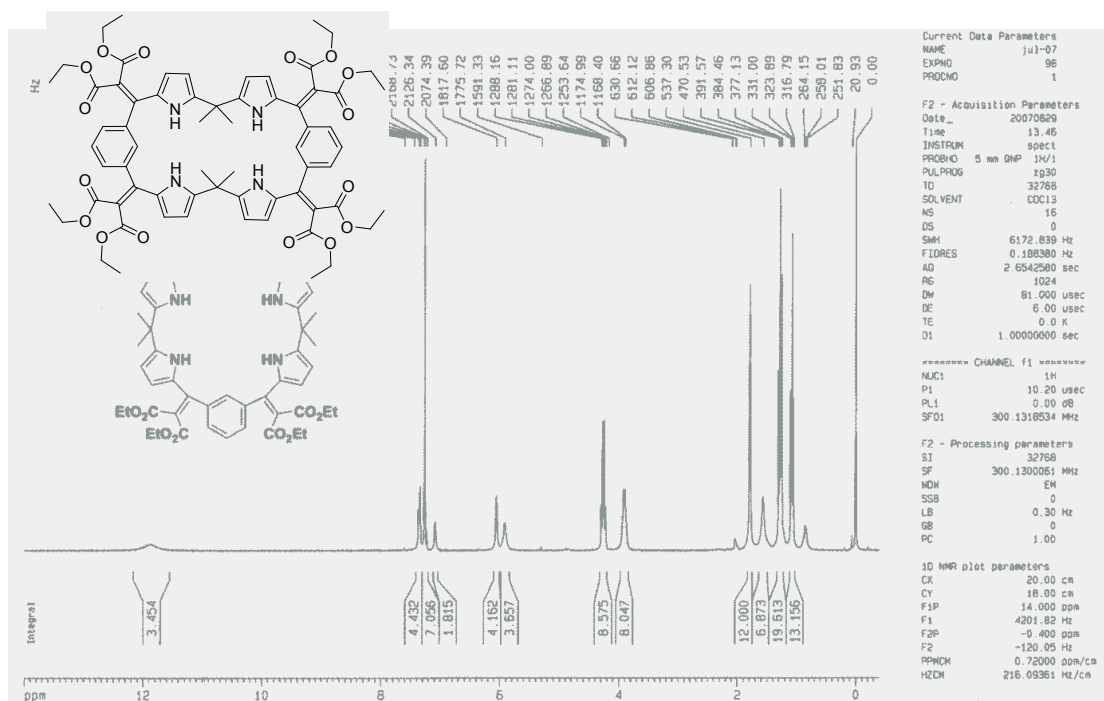

Figure S8. MALDI-TOF mass spectrum of compound 8.

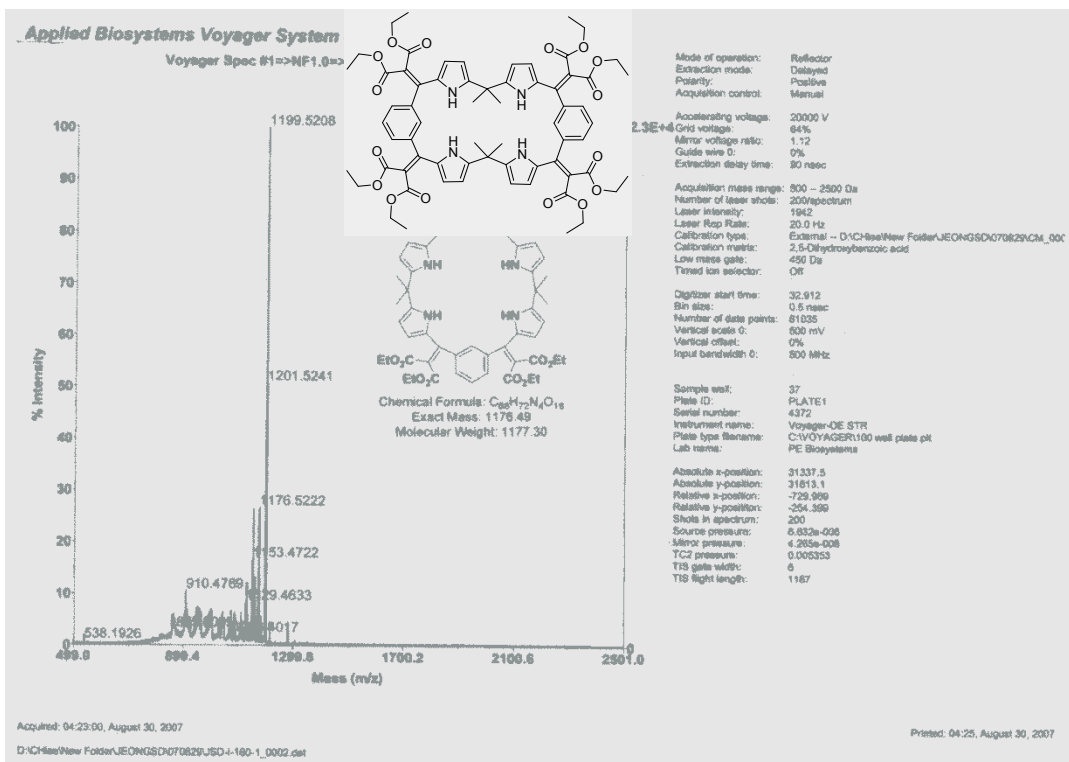

Figure S9. <sup>13</sup>C NMR spectrum of compound 8 in CDCl<sub>3</sub>.

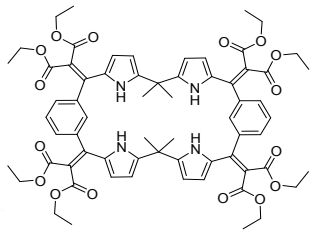

PDW-II-97-1

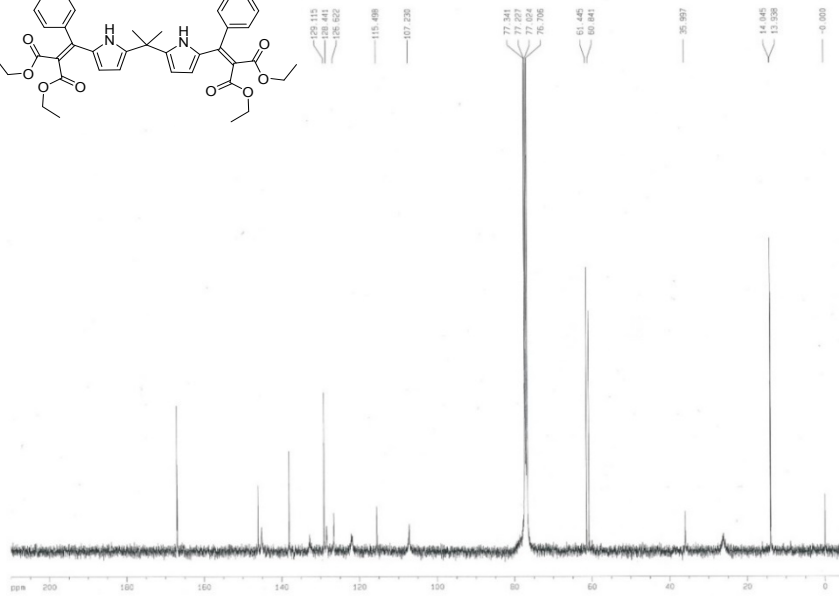

```

Current Data Parameters
NAME          Jan-13
EXPNO         44
PROCNO        1

F2 - Acquisition Parameters
Date_         20130611
Time          9.42
INSTRUM       spect
PROBHD        5 mm Dual 13C/
PULPROG       zgpg30
TD            65536
SOLVENT       CDCl3
NS            20480
DS            2
SWH           31847.133 Hz
FIDRES        0.485049 Hz
AQ            1.0389652 sec
RG            1924.6
DW            15.700 usec
DE            6.00 usec
TE            298.2 K
D1            2.00000000 sec
d11           0.03000000 sec
DELTA         1.89999999 sec
MCREST        0.00000000 sec
MCARR         0.21500000 sec

----- CHANNEL f1 -----
NUC1          13C
P1            10.50 usec
PL1           -1.00 dB
SFO1         100.6254358 MHz

----- CHANNEL f2 -----
CPDPRG2       waltz16
NUC2          1H
PCPD2         100.00 usec
PL2           -2.00 dB
PL12          19.00 dB
PL13          20.00 dB
SFO2         400.1324708 MHz

F2 - Processing parameters
SI            32768
SF            100.6270633 MHz
WDW           EM
SSB           0
LB            1.00 Hz
GB            0
PC            1.40

1D NMR plot parameters
CX            30.00 cm
CY            150.00 cm
F1P           210.000 ppm
F1            21126.68 Hz
F2P           -5.000 ppm
F2            -503.00 Hz
PRNCH         7.16667 ppm/cm
HZCH         721.05817 Hz/cm

```

**Figure S10.** UV-vis absorption spectra of compound **8** (red line) in  $\text{CHCl}_3$  ( $[\mathbf{8}] = 1.68 \times 10^{-5} \text{ M}$ ) and compound **2** (Black line).

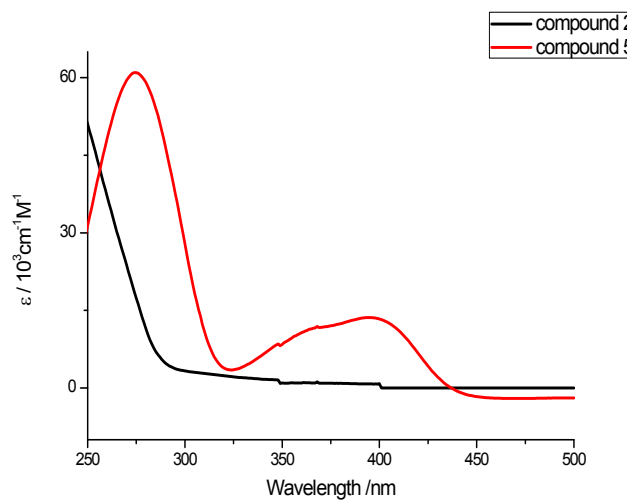

Supplement: c3cc49380f1.pdf [file c3cc49380f1.pdf]
